# Supplementary material
Source: MDPI journal article supplement (https://www.mdpi.com/2073-4441/15/13/2328)
Supplement: s1 [file s1]

# Synergistic Removal of $\beta$ -Hexachlorocyclohexane from Water via Microorganism–Plant Technology and Analysis of Bacterial Community Characteristics

Huijun Shi <sup>1</sup>, Shuang Luo <sup>1</sup>, Yanpeng Liang <sup>2,3,\*</sup>, Litang Qin <sup>1,2</sup>, Honghu Zeng <sup>1,3,\*</sup> and Xiaohong Song <sup>1,2</sup>

<sup>1</sup> College of Environmental Science and Engineering, Guilin University of Technology, Guilin 541004, China; shj1996326@outlook.com (H.S.); lsh1101@outlook.com (S.L.); qinsar@glut.edu.cn (L.Q.); songxh@glut.edu.cn (X.S.)

<sup>2</sup> Guangxi Key Laboratory of Environmental Pollution Control Theory and Technology, Guilin University of Technology, Guilin 541004, China

<sup>3</sup> Collaborative Innovation Center for Water Pollution Control and Water Security in Karst Region, Guilin University of Technology, Guilin 541004, China

\* Correspondence: liangyanpeng@glut.edu.cn (Y.L.); zenghonghu@glut.edu.cn (H.Z.); Tel.: +86-136-0773-9605 (Y.L.)

The 16S rDNA sequence of Och1:

CAGAACGAACGCTGGCGGCAGGCTTAACACATGCAAGTCGAGCGCCCCGCAAG  
GGGAGCGGCAGACGGGTGAGTAACGCGTGGAACGTACCATTGCTACGGAATA  
ACTCAGGGAACTTGTGCTAATACCGTATGAGCCCCGAAAGGGGAAAGATTTATCG  
GCAAATGATCGGCCCCGCGTTGGATTAGCTAGTTGGTGGGGTAAAGGCCTACCAAG  
GCGACGATCCATAGCTGGTCTGAGAGGATGATCAGCCACACTGGGACTGAGACA  
CGGCCAGACTCCTACGGGAGGCAGCAGTGGGGAATATTGGACAATGGGCGCAA  
GCCTGATCCAGCCATGCCGCGTGAGTGATGAAGGCCCTAGGGTTGTAAAGCTCTT  
TCACCGGTGAAGATAATGACGGTAACCGGAGAAGAAGCCCCGGCTAACTTCGTG  
CCAGCAGCCGCGGTAATACGAAGGGGGCTAGCGTTGTTTCGGATTTACTGGGCGTA  
AAGCGCACGTAGGCGGGCTAATAAGTCAGGGGTGAAATCCCGGGGCTCAACCCC  
GGAAGTGCCTTTGATACTGTTAGTCTTGAGTATGGTAGAGGTGAGTGGAATTCGA  
GTGTAGAGGTGAAATTCGTAGATATTCGGAGGAACACCAGTGGCGAAGGCGGCT  
CACTGGACCATTACTGACGCTGAGGTGCGAAAGCGTGGGGAGCAAACAGGATTA  
GATACCCTGGTAGTCCACGCCGTAAACGATGAATGTTAGCCGTTGGGGAGTTTACT  
CTTCGGTGGCGCAGCTAACGCATTAAACATTCCGCCTGGGGAGTACGGTCGCAAG  
ATTAAAACTCAAAGGAATTGACGGGGGCCCGCACAAGCGGTGGAGCATGTGGTT  
TAATTCGAAGCAACGCGCAGAACCTTACCAGCCCTTGACATCCCGATCGCGGTTA  
GTGGAGACACTATCCTTCAGTTCGGCTGGATCGGAGACAGGTGCTGCATGGCTGT  
CGTCAGCTCGTGTCTGAGATGTTGGGTAAAGTCCCGCAACGAGCGCAACCCTCG  
CCCTTAGTTGCCAGCATTGAGTTGGGCACTCTAAGGGGACTGCCGGTGATAAGCC  
GAGAGGAAGGTGGGGATGACGTCAAGTCCTCATGGCCCTTACGGGCTGGGCTAC  
ACACGTGCTACAATGGTGGTGACAGTGGGCGGCGAGCACGCGAGTGTGAGCTAA  
TCTCCAAAAGCCATCTCAGTTCGGATTGCACTCTGCAACTCGAGTGCATGAAGTT  
GGAATCGCTAGTAATCGCGGATCAGCATGCCGCGGTGAATACGTTCCCGGGCCTT

GTACACACCGCCCGTCACACCATGGGAGTTGGTTTTACCCGAAGGCGCTGTGCTA  
ACCGCAAGGAGGCAGGCGACCACGGTAGGGTCAGCGACTGGGGTGAA

The 16S rDNA sequence of Och2:

GAACGAACGCTGGCGGCAGGCTTAACACATGCAAGTCGAGCGCCCCGCAAGGG  
GAGCGGCAGACGGGTGAGTAACGCGTGGGAACGTACCATTGCTACGGAATAAC  
TCAGGGAAACTTGTGCTAATACCGTATGAGCCCGAAAGGGGAAAGATTTATCGGC  
AAATGATCGGCCCCGCGTTGGATTAGCTAGTTGGTGGGGTAAAGGCCTACCAAGGC  
GACGATCCATAGCTGGTCTGAGAGGATGATCAGCCACACTGGGACTGAGACACG  
GCCCAGACTCCTACGGGAGGCAGCAGTGGGGAATATTGGACAATGGGCGCAAGC  
CTGATCCAGCCATGCCGCGTGAGTGATGAAGGCCCTAGGGTTGTAAAGCTCTTTC  
ACCGGTGAAGATAATGACGTAACCGGAGAAGAAGCCCCGGCTAACTTCGTGCC  
AGCAGCCGCGGTAATACGAAGGGGGCTAGCGTTGTTCCGATTTACTGGGCGTAAA  
GCGCACGTAGGCGGGCTAATAAGTCAGGGGTGAAATCCCCGGGGCTCAACCCCGG  
AACTGCCTTTGATACTGTTAGTCTTGAGTATGGTAGAGGTGAGTGGAATTCCGAGT  
GTAGAGGTGAAATTCGTAGATATTCCGAGGAACACCAGTGGCGAAGGCGGCTCA  
CTGGACCATTACTGACGCTGAGGTGCGAAAGCGTGGGGAGCAAACAGGATTAGA  
TACCCTGGTAGTCCACGCCGTAAACGATGAATGTTAGCCGTTGGGGAGTTTACTCT  
TCGGTGGCGCAGCTAACGCATTAAACATTCCGCCTGGGGAGTACGGTCGCAAGAT  
TAAAACTCAAAGGAATTGACGGGGGGCCCGCACAAAGCGGTGGAGCATGTGGTTTA  
ATTCGAAGCAACGCGCAGAACCTTACCAGCCCTTGACATCCCGATCGCGGTTAGT  
GGAGACACTATCCTTCAGTTCGGCTGGATCGGAGACAGGTGCTGCATGGCTGTCTG  
TCAGCTCGTGTCTGTGAGATGTTGGGTAAAGTCCCGCAACGAGCGCAACCCTCGCC  
CTTAGTTGCCAGCATTAGTTGGGCACTCTAAGGGGACTGCCGGTGATAAGCCGA  
GAGGAAGGTGGGGATGACGTCAAGTCCTCATGGCCCTTACGGGCTGGGCTACAC  
ACGTGCTACAATGGTGGTGACAGTGGGCAGCGAGCACGCGAGTGTGAGCTAATC  
TCCAAAAGCCATCTCAGTTCGGATTGCACTCTGCAACTCGAGTGCATGAAGTTGG  
AATCGCTAGTAATCGCGGATCAGCATGCCGCGGTGAATACGTTCCCGGGCCTTGTA  
CACACCGCCCGTCACACCATGGGAGTTGGTTTTACCCGAAGGCGCTGTGCTAACC  
GCAAGGAGGCAGGCGACCACGGTAGGGTCAGCGACTGGGGTGA

The 16S rDNA sequence of Pse1:

CAGATTGAACGCTGGCGGCAGGCCTAACACATGCAAGTCGAGCGGATGAGGAGA  
GCTTGCTCTCTGATTCAGCGGCGGACGGGTGAGTAATGCCTAGGAATCTGCCTGG  
TAGTGGGGGACAACGTTTCGAAAGGAACGCTAATACCGCATACTCCTACGGGA  
GAAAGTGGGGGATCTTCGGACCTCACGCTATCAGATGAGCCTAGGTTCGATTAGC  
TAGTTGGTGGGGTAACGGCTACCAAGGCGACGATCCGTAACTGGTCTGAGAGG  
ATGATCAGTCACACTGGAAGTGGAGACACGGTCCAGACTCCTACGGGAGGCAGCA  
GTGGGGAATATTGGACAATGGGCGAAAGCCTGATCCAGCCATGCCGCGTGTGTGA  
AGAAGGCCCTCGGGTCGTAAAGCACTTTAAGCTGGGAGGAAGGGTTGTAACCTA  
ATACGTTGCAGCTTTGACGTTACCAGCAGAATAAGCACCGGCTAACTCTGTGCCA  
GCAGCCGCGGTAATACAGAGGGTGCAAGCGTTAATCGGAATTACTGGGCGTAAA  
GCGCGCGTAGGTGGCTTGGTAAAGTTGAATGTGAAATCCCCGGGCTCAACCTGGGA

ACTGCATCCAAAACCTGCCTGGCTAGAGTACGGTAGAGGGTGGTGGAATTTCTGT  
 GTAGCGGTGAAATGCGTAGATATAGGAAGGAACACCAGTGGCGAAGGCGACCAC  
 CTGGACTGATACTGACACTGAGGTGCGAAAGCGTGGGGAGCAAACAGGATTAGA  
 TACCCTGGTAGTCCACGCCGTAAACGATGTCAACTAGCCGTTGGGGTCTTGAGA  
 CTTTAGTGGCGCAGCTAACGCAATAAGTTGACCGCCTGGGGAGTACGGCCGCAA  
 GGTAAAACCTCAAATGAATTGACGGGGGCCCCGCACAAGCGGTGGAGCATGTGGT  
 TTAATTCGAAGCAACGCGAAGAACCTTACCAGGCCTTGACATGCAGAGAACTTTC  
 CAGAGATGGAGAGGTGCCTTCGGGAGCTCTGACACAGGTGCTGCATGGCTGTCGT  
 CAGCTCGTGTCTGAGATGTTGGGTAAAGTCCCGTAACGAGCGCAACCCTTGTC  
 TTAGTTACCAGCACATCATGGTGGGCACTCTAAGGAGACTGCCGGTGACAAACCG  
 GAGGAAGGTGGGGATGACGTCAAGTCATCATGGCCCTTACGGCCTGGGCTACAC  
 ACGTGCTACAATGGTCGGTACAAAGGGTTGCCAAACCGCGAGGTGGAGCTAATC  
 CCATAAAACCGATCGTAGTCCGGATCGCAGTCTGCAACTCGACTGCGTGAAGTCG  
 GAATCGCTAGTAATCGTGAATCAGAACGTCACGGTGAATACGTTCCCGGGCCTTG  
 TACACACCGCCCGTCACACCATGGGAGTGGGTTCACCAGAAGTAGCTAGTCTAA  
 CCTTCGGGAGGACGGTTACCACGGTGTGATTCATGACTGGGGTGAAGTCGT

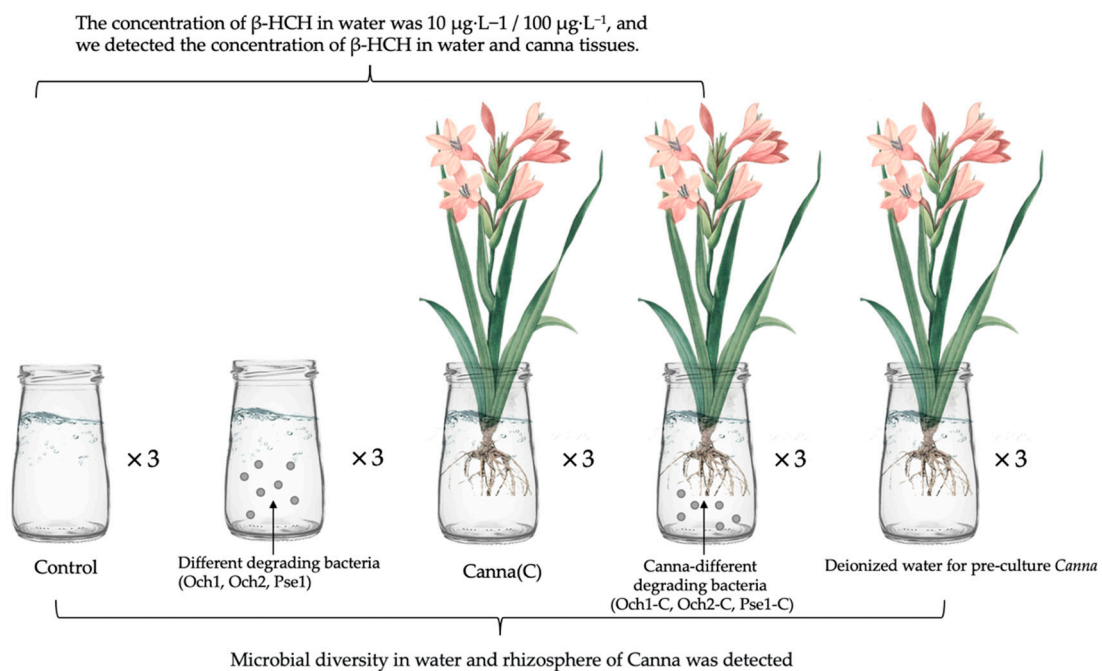

Figure S1. Experimental process diagram

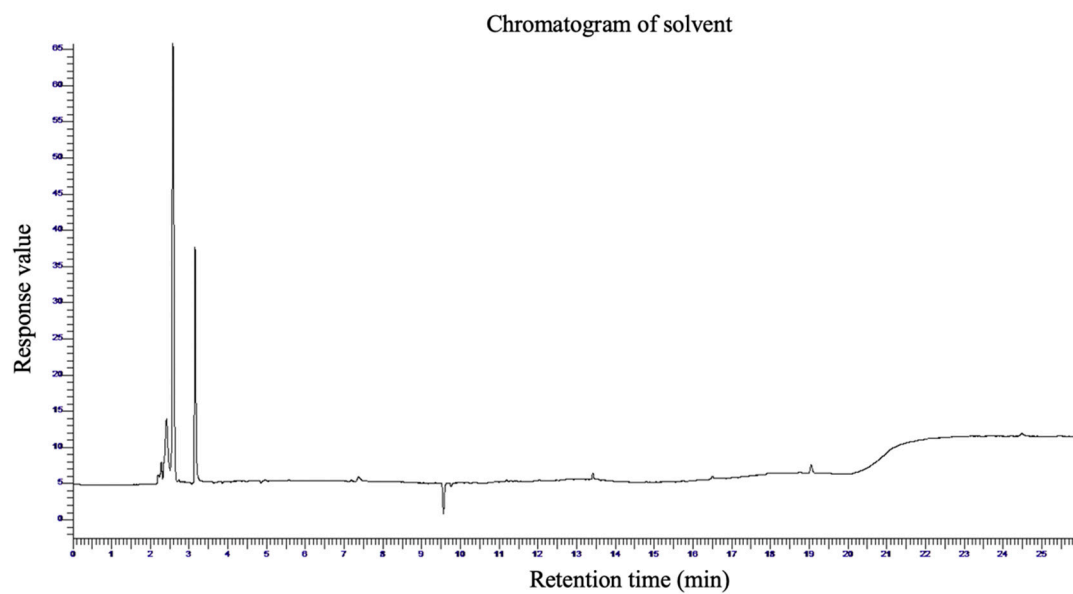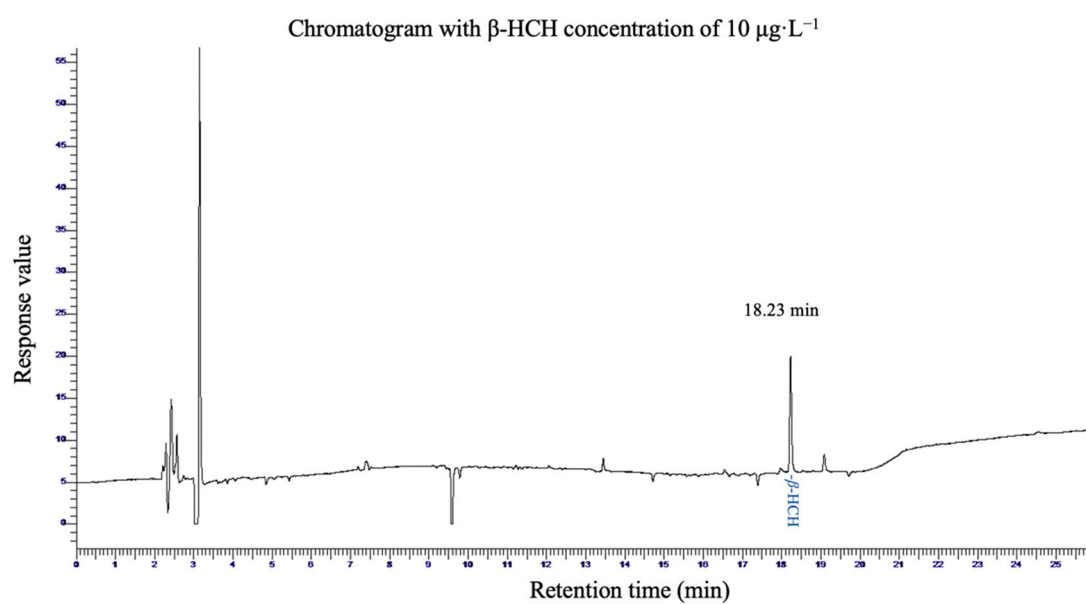

Figure S2. Chromatogram of  $\beta$ -HCH detection

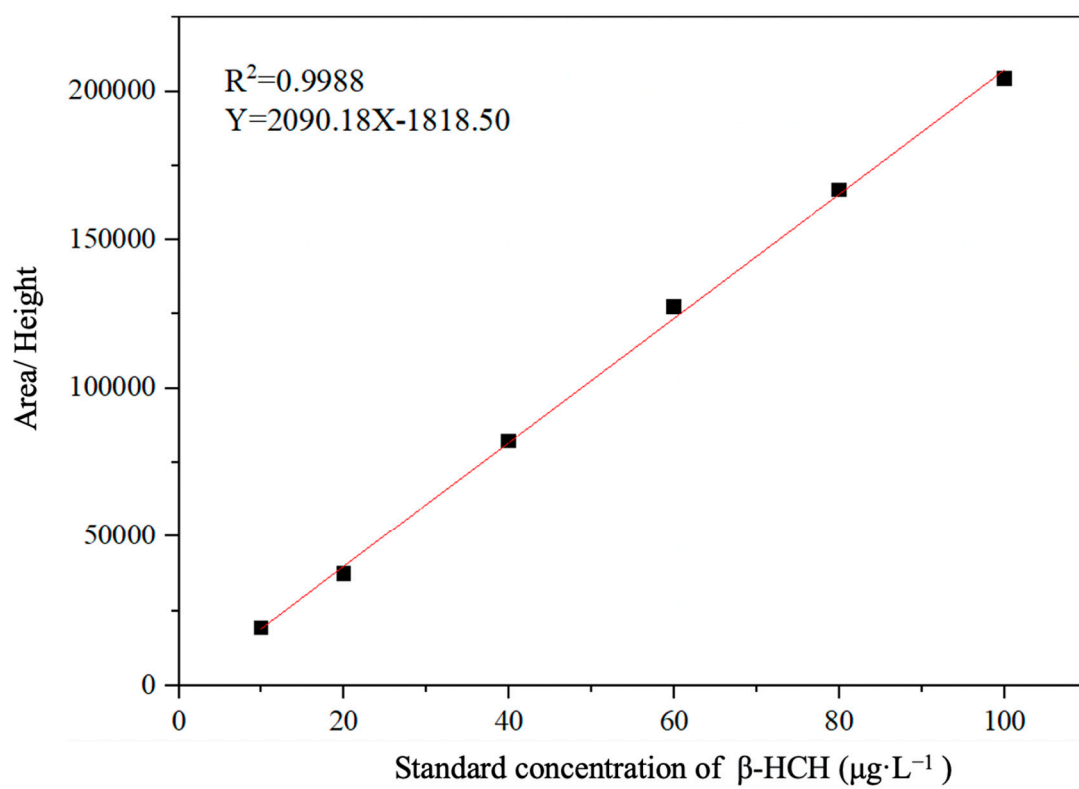

Figure S3. Standard curve of  $\beta$ -HCH
